# Supplementary material
Source: publisher site journal article supplement (http://kjim.org/upload/media/kjim-2020-452-suppl2.pdf)
Supplement: Supplementary file 1 [file kjim-2020-452-suppl2.pdf]

**Supplemental Table 2. Comparison of clinical practice according to the age groups in the management of pancreatic cystic neoplasms**

| Variable                                                                                | Young <sup>a</sup> participants<br>(n = 81) | Old <sup>b</sup> participants<br>(n = 34) | p value |
|-----------------------------------------------------------------------------------------|---------------------------------------------|-------------------------------------------|---------|
| Sex, male/female                                                                        | 79/2                                        | 32/2                                      | 0.580   |
| Specialty                                                                               |                                             |                                           | 0.320   |
| Gastroenterologist                                                                      | 76 (93.8)                                   | 34 (100)                                  |         |
| Surgeon                                                                                 | 5 (6.2)                                     | 0                                         |         |
| Type of hospital                                                                        |                                             |                                           | 0.903   |
| PS                                                                                      | 24 (29.6)                                   | 8                                         |         |
| TA                                                                                      | 57 (70.4)                                   | 26 (76.5)                                 |         |
| Performing EUS                                                                          | 71 (87.7)                                   | 31 (91.2)                                 | 0.752   |
| Preferred guidelines                                                                    |                                             |                                           | 0.255   |
| 2012/2017 IAP                                                                           | 56 (69.1)                                   | 19 (55.9)                                 |         |
| 2018 ACG                                                                                | 15 (18.5)                                   | 7 (20.6)                                  |         |
| 2018 European                                                                           | 10 (12.3)                                   | 8 (23.5)                                  |         |
| Preferred initial imaging modalities                                                    |                                             |                                           | 0.509   |
| Enhanced CT                                                                             | 15 (18.5)                                   | 11 (32.4)                                 |         |
| GE-MRI/MRCP                                                                             | 33 (40.7)                                   | 14 (41.2)                                 |         |
| MRI/MRCP                                                                                | 11 (13.6)                                   | 3 (8.8)                                   |         |
| EUS                                                                                     | 21 (25.9)                                   | 6 (17.6)                                  |         |
| ERCP                                                                                    | 1 (1.2)                                     | 0                                         |         |
| Preferred follow-up imaging modalities                                                  |                                             |                                           | 0.433   |
| Enhanced CT                                                                             | 51 (63)                                     | 16 (47.1)                                 |         |
| GE-MRI/MRCP                                                                             | 6 (7.4)                                     | 6 (17.6)                                  |         |
| MRI/MRCP                                                                                | 12 (14.8)                                   | 7 (20.6)                                  |         |
| EUS                                                                                     | 8 (9.9)                                     | 3 (8.8)                                   |         |
| US                                                                                      | 4 (4.9)                                     | 2 (5.9)                                   |         |
| What time interval would you choose for surveillance in 2–3 cm PCNs                     |                                             |                                           | 0.085   |
| Every 3 months                                                                          | 29 (35.8)                                   | 5 (14.7)                                  |         |
| Every 6 months                                                                          | 49 (60.5)                                   | 27 (79.4)                                 |         |
| Every year                                                                              | 3 (3.7)                                     | 2 (5.9)                                   |         |
| What time interval would you choose for surveillance in PCNs with MPD dilation (5–9 mm) |                                             |                                           | 0.009   |
| Every 3 months                                                                          | 10 (12.3)                                   | 0                                         |         |
| Every 6 months                                                                          | 64 (79)                                     | 28 (82.3)                                 |         |
| Every years                                                                             | 7 (8.7)                                     | 6 (17.1)                                  |         |
| Do you follow-up PCNs for more than 5 years                                             |                                             |                                           | 0.317   |
| Yes                                                                                     | 77 (95.1)                                   | 34 (100)                                  |         |
| No                                                                                      | 4 (3.6)                                     | 0                                         |         |
| When would you usually recommend surgery                                                |                                             |                                           | 0.593   |
| High-risk stigmata <sup>c</sup>                                                         | 66 (81.5)                                   | 28 (82.4)                                 |         |
| Worrisome features <sup>d</sup>                                                         | 15 (18.5)                                   | 6 (17.6)                                  |         |

Values are presented as number (%).

PS, primary/secondary; TA, tertiary/academic; EUS, endoscopic ultrasound; IAP, International Association of Pancreatology; ACG, American College Gastroenterology; CT, computed tomography; GE-MRI/MRCP, gadolinium-enhanced magnetic resonance imaging/magnetic resonance cholangiopancreatography; ERCP, endoscopic retrograde choangiopancreatography; US, ultrasound; PCN, pancreas cystic neoplasm; MPD, main pancreatic duct.

<sup>a</sup>Participants aged 31 to 50 years were categorized as young.

<sup>b</sup>Participants aged 50 above were categorized as old.

<sup>c</sup>High-risk stigmata including obstructive jaundice due to cyst, enhancing mural nodule ( $\geq 5$  mm), MPD dilation ( $\geq 10$  mm) [6].

<sup>d</sup>Worrisome features including cyst ( $\geq 3$  cm), enhancing mural nodule ( $\leq 5$  mm), MPD dilation (5–6 mm), cyst growth rate  $\geq 5$  mm/2 years, thickened/enhancing cyst walls, abrupt change in pancreatic duct diameter with distal pancreatic atrophy, lymphadenopathy, increased serum level of CA 19-9 [6].
